# Supplementary material
Source: MDPI journal article supplement (https://www.mdpi.com/1999-4907/14/10/1930)
Supplement: s1 [file s1 › Table S2.xlsx]

## Sheet: Sheet1
Supplementary Material Table S2: Presence-absence of each amphibian species, respectively represented by a numerical value of 1 or zero, per sampled vernal pool using eDNA and traditional sampling. Per species, the left number indicates a detection using eDNA metabarcoding at that vernal pool while right number indicates a detection using the aggregation of the three traditional inventory methods…
Order	Family		Species	EC5V	EC13V	ET1V	EV98	EV99	EVC1	EVC4	EVC5	EVC13	EVP4	HP3	site2
Anura	Bufonidae	Anaxyrus americanus*		1/1	0/0	0/0	0/0	0/0	1/0	0/0	0/0	1/0	1/0	0/0	0/0
	Hylidae	Hyla versicolor*		1/0	0/0	1/0	0/0	0/0	0/0	0/0	1/0	0/0	1/0	0/0	0/0
		Pseudacris crucifer*		0/1	0/1	0/1	1/0	0/1	0/1	1/0	0/1	0/1	1/1	0/1	1/1
		Ps. maculata		0/0	0/0	0/0	0/0	0/0	0/0	0/0	0/0	0/0	0/0	0/0	0/0
		Ps. triseriata		0/0	0/0	0/0	0/0	0/0	0/0	0/0	0/0	0/0	0/0	0/0	0/0
	Ranidae	Lithobates catesbeianus*		0/0	0/0	0/0	1/0	0/0	1/0	1/0	0/0	1/1	0/0	0/0	0/0
		L. clamitans*		1/1	1/1	1/1	1/1	1/1	1/1	1/1	1/1	1/1	1/1	1/1	1/1
		L. palustris*		0/0	0/0	0/0	0/0	0/0	0/0	0/0	0/0	1/0	0/0	0/0	0/0
		L. pipiens		0/0	0/0	0/0	0/0	0/0	0/0	0/0	0/0	0/1	0/0	0/0	0/0
		L. septentrionalis*		0/0	0/0	0/0	0/0	0/0	0/0	0/0	0/0	0/0	0/0	0/0	0/0
		L. sylvaticus		0/1	0/0	1/1	0/0	0/0	1/0	0/1	1/1	0/0	0/0	1/1	0/0
Urodela	Ambystomatidae	Ambystoma laterale		0/0	0/0	0/0	0/0	0/0	0/0	1/0	1/0	0/0	1/0	0/0	0/0
		Am. maculatum*		0/1	0/0	1/0	1/0	0/1	1/0	1/0	1/0	0/0	1/0	1/0	1/0
	Plethodontidae	Desmognathus fuscus		0/0	0/0	0/0	0/0	0/0	0/0	0/0	0/0	0/0	0/0	0/0	0/0
		D. ochrophaeus		0/0	0/0	0/0	0/0	0/0	0/0	0/0	0/0	0/0	0/0	0/0	0/0
		Eurycea bislineata*		0/0	0/0	0/0	0/0	0/0	0/0	0/0	0/0	0/0	0/0	0/0	0/0
		Gyrinophilus porphyriticus		0/0	0/0	0/0	0/0	0/0	0/0	0/0	0/0	0/0	0/0	0/0	0/0
		Hemidactylium scutatum*		0/0	0/0	0/0	0/0	0/0	0/0	0/0	0/0	0/1	0/0	0/0	0/0
		Plethodon cinereus*		0/1	0/1	0/1	0/1	0/1	0/1	0/1	1/1	0/1	0/1	1/1	0/1
	Proteidae	Necturus maculosus		0/0	0/0	0/0	0/0	0/0	0/0	0/0	0/0	0/0	0/0	0/0	0/0
	Salamandridae	Notophthalmus viridescens*		0/0	1/0	1/0	1/0	0/0	0/0	1/1	1/1	0/1	0/1	0/0	0/0
