# Supplementary material
Source: MDPI journal article supplement (https://www.mdpi.com/1999-4907/14/10/1930)
Supplement: s1 [file s1 › Text S1.txt]

usearch -fastq_mergepairs reads/*R1.fq -fastqout merged455.fq -relabel @ -fastq_maxdiffs 10 -fastq_pctid 80 -fastq_minmergelen 455 -fastq_maxmergelen 455 -report mergeReport455.log
usearch -fastq_mergepairs reads/*R1.fq -fastqout merged176.fq -relabel @ -fastq_maxdiffs 10 -fastq_pctid 80 -fastq_minmergelen 176 -fastq_maxmergelen 176 -report mergeReport176.log
usearch -fastx_truncate merged455.fq -stripleft 26 -stripright 26 -fastqout stripped455.fq
usearch -fastx_truncate merged176.fq -stripleft 26 -stripright 26 -fastqout stripped176.fq
usearch -fastq_filter stripped455.fq -fastq_maxee 1.0 -fastaout filtered455.fa 2> filter455.log
usearch -fastq_filter stripped176.fq -fastq_maxee 1.0 -fastaout filtered176.fa 2> filter176.log
usearch -fastx_uniques filtered455.fa -fastaout uniques455.fa -sizeout -relabel Uniq
usearch -fastx_uniques filtered176.fa -fastaout uniques176.fa -sizeout -relabel Uniq
usearch -unoise3 uniques455.fa -zotus otus455.fa -minsize 4 -tabbedout 455_denoise.log
usearch -unoise3 uniques176.fa -zotus otus176.fa -minsize 4 -tabbedout 176_denoise.log
usearch -sintax otus455.fa -db COI-171205.fa -tabbedout otus455.tax -strand plus -sintax_cutoff 0.8
usearch -sintax otus176.fa -db COI-171205.fa -tabbedout otus176.tax -strand plus -sintax_cutoff 0.8
usearch -otutab stripped455.fq -zotus otus455.fa -otutabout otus455.tab -sample_delim .
usearch -otutab stripped176.fq -zotus otus176.fa -otutabout otus176.tab -sample_delim .
